# Supplementary material for: Combined effect of polycan, a β-glucan from Aureobasidium pullulans, and regular resistance exercise on muscle strength, biomarkers, and fitness profiles in adults with relatively low skeletal muscle mass: a randomised controlled trial
Source: Royal Society of Chemistry journal article supplement (doi:10.1039/d3fo00589e), 2023-01-01
Supplement: d3fo00589e1.pdf [file d3fo00589e1.pdf]

1 **Synergic effect of *Aureobasidium Pullulans* produced beta-glucan and resistance**  
2 **exercise on muscle strength, biomarkers, and fitness profiles in adults with relative**  
3 **sarcopenia: a randomized, double-blinded, placebo-controlled trial**

4 Hyun Jun Kim, Shin Jae Suk, Kim Won Gyeong, and Sang Yeoup Lee

5 **SUPPLEMENTARY TABLE 1 Summary of comprehensive measurements by category**

| <b>Category</b>                   | <b>Measurements</b>                                                                                                                                    |
|-----------------------------------|--------------------------------------------------------------------------------------------------------------------------------------------------------|
| <b>Muscle function (strength)</b> | <b>Peak torque (TQ) at 60°/s of knee extension/flexion, Handgrip strength</b>                                                                          |
| <b>Lean body mass and fat%</b>    | <b>Appendicular skeletal mass index, Skeletal muscle mass index, Body composition (Total fat%, Trucal fat%)</b>                                        |
| <b>Training-induced fatigue</b>   | <b>Lactate, Creatine kinase, Insulin growth factor-1, Growth hormone</b>                                                                               |
| <b>Inflammatory status</b>        | <b>High-sensitivity C-reactive protein</b>                                                                                                             |
| <b>Quality of life</b>            | <b>Euro-QoL-5D score</b>                                                                                                                               |
| <b>Safety monitoring</b>          | <b>Blood pressure, Aspartate transaminase, Alanine transaminase, Creatinine, Glucose</b>                                                               |
| <b>Fitness profile</b>            | <b>Sit-up, Sit and reach, Single leg stance, 6-min walk test, 400-meter walk test, 10-meter obstacle walk test, Short physical performance battery</b> |
| <b>Additional effects</b>         | <b>Lipid profile, Insulin resistance, Free fatty acid</b>                                                                                              |

6  
7  
8  
9  
10  
11  
12  
13  
14  
15  
16  
17

18

19 **SUPPLEMENTARY TABLE 2 Resistance exercise program**

|                  |                                                                                                                                                                                                                                                                                                                                                                                                                                                                                                                                                                                                                                                                                                   |
|------------------|---------------------------------------------------------------------------------------------------------------------------------------------------------------------------------------------------------------------------------------------------------------------------------------------------------------------------------------------------------------------------------------------------------------------------------------------------------------------------------------------------------------------------------------------------------------------------------------------------------------------------------------------------------------------------------------------------|
| <b>Time</b>      | 50 min per session. The three groups were arranged at 9:00–9:50 am, 10:00–10:50 am, and 11:00–11:50 am, respectively.                                                                                                                                                                                                                                                                                                                                                                                                                                                                                                                                                                             |
| <b>Frequency</b> | Three times a week (Mon, Wed, and Fri)                                                                                                                                                                                                                                                                                                                                                                                                                                                                                                                                                                                                                                                            |
| <b>Intensity</b> | Depending on the degree of the adaptation of the subject and the degree of improvement in the muscle strength, the length of the elastic band, the number of repetitions (8-12 times), and the number of sets (1-2 sets) were gradually increased. Subjects exercised with a value of 11-12 rated perceived exertion (RPE) scale (light activity) using a green band for 1-4 weeks, and a blue band was used to set a value of 13-14 of RPE (somewhat hard activity) for 6-12 weeks. In the case of resistance exercise, it is dangerous to measure 1 repetition maximum (1RM) in the elderly; therefore, 8-12 repetitions of movements by Westcott & Baechle were estimated to be 55–60% of 1RM. |
| <b>Place</b>     | The Reflex Balance Thera Fitness Center (Changwon-si, Gyeongsangnam-do, Republic of Korea) maintained temperature and humidity of 20–22 °C and 40–50%, respectively.                                                                                                                                                                                                                                                                                                                                                                                                                                                                                                                              |

20

21

22

23

24

25

26

27

28

29

30

31

32

33

34



36 **SUPPLEMENTARY TABLE 3** Secondary outcome measure of the two groups (PP analysis)<sup>1</sup>

|                                             | APβG group (n = 30) |                   | Placebo group (n = 30) |                   | Adjusted difference of APβG vs placebo | P <sup>2</sup> |
|---------------------------------------------|---------------------|-------------------|------------------------|-------------------|----------------------------------------|----------------|
|                                             | Baseline            | 12 wk             | Baseline               | 12 wk             |                                        |                |
| Handgrip (right), kg                        | 26.1 ± 6.8          | 28.7 ± 7.4**      | 28.1 ± 9.2             | 29.5 ± 9.8**      | 1.40 (0.19, 2.61)                      | 0.024          |
| Handgrip (left), kg                         | 25.8 ± 6.9          | 27.8 ± 7.1**      | 27.6 ± 9.2             | 28.3 ± 9.0        | 1.33 (0.01, 2.65)                      | 0.048          |
| ASM/height <sup>2</sup> , kg/m <sup>2</sup> | 5.58 ± 1.05         | 5.73 ± 1.02**     | 5.95 ± 1.23            | 6.11 ± 1.20**     | -0.03 (-0.19, 0.12)                    | 0.679          |
| ASM/weight x 100                            | 23.8 ± 3.8          | 24.3 ± 3.3*       | 24.7 ± 4.0             | 25.1 ± 3.6        | 0.09 (-0.50, 0.67)                     | 0.773          |
| Total fat percent, %                        | 37.8 ± 5.4          | 35.4 ± 5.4**      | 35.0 ± 6.8             | 33.6 ± 6.4**      | 0.07 (-0.79, 0.93)                     | 0.874          |
| Truncal fat percent, %                      | 37.8 ± 6.0          | 36.8 ± 5.8**      | 36.8 ± 7.3             | 35.8 ± 6.6**      | -0.21 (-1.30, 0.89)                    | 0.708          |
| Hs-CRP, mg/dl                               | 0.40 [0.40-0.70]    | 0.50 [0.30-0.98]  | 0.60 [0.40-0.80]       | 0.50 [0.25-0.80]  | -0.38 (-1.72, 0.96)                    | 0.458          |
| Lactate, mg/dL                              | 10.6 ± 4.1          | 10.6 ± 4.2        | 10.7 ± 5.4             | 11.1 ± 4.9        | 1.00 (-1.15, 3.15)                     | 0.356          |
| CK, IU/L                                    | 114.0 [86.5-154.8]  | 95.0 [80.0-119.3] | 93.0 [78.0-127.5]      | 96.5 [72.5-146.5] | -13.50 (-38.33, 11.34)                 | 0.105          |
| IGF-1, ng/mL                                | 142.5 ± 38.3        | 163.7 ± 42.4**    | 146.1 ± 37.7           | 168.9 ± 42.8**    | 1.00 (-13.52, 15.53)                   | 0.890          |
| GH, ng/mL                                   | 0.91 [0.34-2.17]    | 0.82 [0.41-2.30]  | 0.68 [0.19-1.28]       | 1.18 [0.13-2.94]* | -0.02 (-2.04, 2.00)                    | 0.661          |
| EQ-5D-3L                                    | 0.86 ± 0.04         | 0.86 ± 0.04       | 0.85 ± 0.07            | 0.86 ± 0.04       | 0.01 (-0.01, 0.03)                     | 0.170          |
| EQ-VAS                                      | 80.6 ± 10.9         | 78.7 ± 12.5       | 79.7 ± 17.1            | 80.0 ± 13.1       | 1.91 (-5.21, 9.02)                     | 0.594          |

37 <sup>1</sup>Values are mean ± SD, median [IQR] or mean (95% CI) unless otherwise indicated. PP, per-protocol; APβG, *Aureobasidium pullulans*-  
38 produced β-glucan; ASM, appendicular skeletal muscle; Hs-CRP, High-sensitive C-reactive protein; CK, creatinine kinase; IGF-1, insulin  
39 growth factor-1; GH, growth hormone; EQ-5D-5L, EuroQol-5 dimensions-5-levels; VAS, visual analogue scale

40 <sup>2</sup>ANCOVA or Quade's rank ANCOVA adjusted for sex, protein intake %, and each baseline value as covariates over the 12-week period.

41 \*P<0.05, \*\*P≤0.005 by paired *t*-test or Wilcoxon signed-rank test within each group.

42  
43  
44  
45  
46  
47  
48  
49  
50  
51

52 SUPPLEMENTARY TABLE 4 Additional benefits profile<sup>1</sup>

|                           | APβG group          |                      | Placebo group       |                      | Adjusted difference of APβG vs. placebo | P <sup>2</sup> |
|---------------------------|---------------------|----------------------|---------------------|----------------------|-----------------------------------------|----------------|
|                           | Baseline            | 12 wk                | Baseline            | 12 wk                |                                         |                |
| Intention to treat (n=80) |                     |                      |                     |                      |                                         |                |
| WC, cm                    | 84.1 ± 7.8          | 81.6 ± 7.3**         | 86.8 ± 7.5          | 85.2 ± 7.4           | -1.91 (-4.61, 0.80)                     | 0.164          |
| HOMA-IR                   | 1.38 [0.82-2.05]    | 1.51 [1.03-2.11]     | 1.71 [1.04-2.45]    | 1.74 [1.02-2.63]     | 0.92 (-1.08, 2.91)                      | 0.938          |
| FFA, mg/dL                | 439.5 [311.8-583.0] | 395.9 [302.5-526.8]* | 455.0 [337.8-627.5] | 370.0 [289.5-448.0]* | -64.32 (-5.03, 133.66)                  | 0.648          |
| TC, mg/dL                 | 196.7 ± 39.8        | 191.6 ± 35.0         | 192.7 ± 38.1        | 185.7 ± 39.9         | 2.34 (-10.77, 15.44)                    | 0.724          |
| Triglyceride, mg/dL       | 101.5 [71.3-128.3]  | 100.5 [76.5-132.0]   | 115.0 [73.0-183.8]  | 126.3 [75.0-157.0]   | -34.15 (-15.70, 84.00)                  | 0.582          |
| HDL-C, mg/dL              | 56.5 ± 11.1         | 55.1 ± 12.4          | 54.2 ± 15.9         | 55.9 ± 15.3          | -1.78 (-6.53, 2.98)                     | 0.458          |
| LDL-C, mg/dL              | 118.3 ± 37.5        | 114.7 ± 36.7         | 110.8 ± 40.9        | 106.9 ± 38.2         | 0.47 (-12.34, 13.29)                    | 0.941          |
| Per protocol (n=60)       |                     |                      |                     |                      |                                         |                |
| WC, cm                    | 82.9 ± 7.2          | 79.9 ± 7.6**         | 85.8 ± 6.9          | 85.0 ± 8.1           | -2.56 (-5.58, 0.47)                     | 0.096          |
| HOMA-IR                   | 1.38 [0.77-2.06]    | 1.44 [0.93-2.02]     | 1.49 [1.02-2.43]    | 1.45 [0.96-2.60]     | -1.58 (-1.14, 4.30)                     | 0.982          |
| FFA, mg/dL                | 443.0 [302.3-641.8] | 359.0 [295.0-566.0]* | 453.5 [342.0-631.0] | 316.5 [264.5-453.0]* | 88.60 (-6.73, 183.93)                   | 0.696          |
| TC, mg/dL                 | 199.9 ± 39.4        | 194.7 ± 38.4         | 192.6 ± 40.6        | 185.3 ± 44.1         | -2.78 (-18.09, 12.52)                   | 0.717          |
| Triglyceride, mg/dL       | 107.0 [71.3-125.8]  | 91.0 [75.3-120.3]    | 97.0 [71.5-160.0]   | 101.0 [73.5-157.0]   | 53.80 (-14.52, 122.82)                  | 0.478          |
| HDL-C, mg/dL              | 56.1 ± 10.6         | 55.2 ± 12.3          | 56.0 ± 16.5         | 56.9 ± 16.7          | -1.69 (-7.08, 3.69)                     | 0.531          |
| LDL-C, mg/dL              | 121.6 ± 37.6        | 118.5 ± 39.5         | 110.4 ± 43.2        | 105.8 ± 42.1         | -4.62 (-18.62, 9.39)                    | 0.511          |

53 <sup>1</sup>Values are mean ± SD or mean (95% CI) unless otherwise indicated. APβG, *Aureobasidium pullulans*-produced β-glucan; WC; waist  
54 circumference; HOMA-IR, Homeostatic Model Assessment for Insulin Resistance; FFA, free fatty acid; TC, total cholesterol; HDL-C, high-  
55 density lipoprotein cholesterol; LDL-C, low-density lipoprotein cholesterol

56 <sup>2</sup>ANCOVA or Quade's rank ANCOVA adjusted for sex, protein intake %, and each baseline value as covariates over the 12-wk period. \*P<0.05,

57 \*\*P<0.005 by paired *t*-test or Wilcoxon signed-rank test within each group.

58

59

60

61

62

63 **SUPPLEMENTARY TABLE 5** Laboratory findings evaluating the adverse effects<sup>1</sup>

|                           | APβG group       |                  | Placebo group    |                  | Adjusted difference of APβG vs. placebo over | P <sup>2</sup> |
|---------------------------|------------------|------------------|------------------|------------------|----------------------------------------------|----------------|
|                           | Baseline         | 12 wk            | Baseline         | 12 wk            |                                              |                |
| Intention to treat (n=80) |                  |                  |                  |                  |                                              |                |
| Systolic BP, mmHg         | 137.0 ± 20.8     | 133.5 ± 14.9     | 134.8 ± 18.0     | 131.0 ± 16.6     | 1.22 (-4.92, 7.36)                           | 0.694          |
| Diastolic BP, mmHg        | 85.4 ± 11.7      | 84.1 ± 9.0       | 85.6 ± 10.0      | 83.5 ± 9.9       | 1.07 (-2.41, 4.54)                           | 0.543          |
| AST, IU/L                 | 23.0 [21.0-28.8] | 24.0 [20.0-27.8] | 21.5 [18.3-26.0] | 23.2 [19.3-26.0] | 0.31 (-2.24, 2.86)                           | 0.862          |
| ALT, IU/L                 | 18.0 [15.0-26.0] | 19.7 [15.0-23.9] | 18.5 [14.0-27.8] | 19.0 [13.3-27.0] | 4.24 (0.10 8.37)                             | 0.236          |
| Creatinine, mg/dL         | 0.77 ± 0.13      | 0.78 ± 0.16      | 0.83 ± 0.24      | 0.85 ± 0.23      | -0.01 (-0.07, 0.04)                          | 0.631          |
| Glucose, mg/dL            | 92.0 ± 24.2      | 92.1 ± 16.0      | 95.1 ± 21.9      | 95.8 ± 20.6      | -2.58 (-8.92, 3.76)                          | 0.420          |
| Per protocol (n=60)       |                  |                  |                  |                  |                                              |                |
| Systolic BP, mmHg         | 136.1 ± 21.4     | 133.3 ± 16.3     | 135.3 ± 16.5     | 132.7 ± 16.8     | -1.75 (-9.50, 6.00)                          | 0.653          |
| Diastolic BP, mmHg        | 86.0 ± 11.6      | 84.9 ± 9.9       | 86.0 ± 10.8      | 84.6 ± 10.8      | -0.27 (-4.54, 4.01)                          | 0.901          |
| AST, IU/L                 | 26.5 [21.0-30.5] | 24.0 [19.8-28.3] | 22.5 [18.8-26.0] | 22.0 [19.0-26.3] | -0.02 (-3.20, 3.16)                          | 0.494          |
| ALT, IU/L                 | 18.5 [15.0-26.5] | 17.5 [14.0-24.3] | 17.0 [14.0-27.3] | 17.5 [13.0-27.3] | 4.62 (-0.54, 9.79)                           | 0.953          |
| Creatinine, mg/dL         | 0.77 ± 0.14      | 0.75 ± 0.15      | 0.84 ± 0.25      | 0.84 ± 0.26      | 0.23 (-0.07, 0.02)                           | 0.226          |
| Glucose, mg/dL            | 88.6 ± 20.3      | 91.6 ± 18.3*     | 96.6 ± 23.6      | 97.8 ± 23.1      | -0.05 (-6.22, 6.13)                          | 0.988          |

64 <sup>1</sup>Values are mean ± SD or median [IQR] or mean (95% CI) unless otherwise indicated. APβG, *Aureobasidium pullulans*-produced β-glucan; BP, blood pressure; AST, aspartate transaminase; ALT, alanine transaminase

65  
66 <sup>2</sup>ANCOVA or Quade's rank ANCOVA adjusted for sex, protein intake %, and each baseline value as covariates over the 12-wk period. \*P<0.05  
67 by paired *t*-test or Wilcoxon signed-rank test within each group.

68

69

70

71

72

73

74

75

76

77 **SUPPLEMENTARY TABLE 6** Laboratory findings evaluating adverse events at 12 weeks

| Variables                                | Intention-to-treat population |                   | Per-protocol population |                   |
|------------------------------------------|-------------------------------|-------------------|-------------------------|-------------------|
|                                          | APβG group<br>(n=40)          | Placebo<br>(n=40) | APβG group<br>(n=30)    | Placebo<br>(n=30) |
| High AST ( $\geq 2 \times \text{ULN}$ )  | 0                             | 0                 | 0                       | 0                 |
| High ALT ( $\geq 2 \times \text{ULN}$ )  | 0                             | 0                 | 0                       | 0                 |
| High Cr ( $\geq 1.5 \times \text{ULN}$ ) | 0                             | 0                 | 0                       | 0                 |
| SBP ( $\geq 160$ mmHg)                   | 4                             | 3                 | 2                       | 2                 |
| DBP ( $\geq 100$ mmHg)                   | 1                             | 2                 | 1                       | 2                 |
| FBG ( $\geq 160$ mg/dL)                  | 1                             | 1                 | 1                       | 1                 |

78 APβG, *Aureobasidium pullulans*-produced β-glucan; AST, aspartate aminotransferase; ALT,  
 79 alanine aminotransferase; Cr, creatinine; SBP, systolic blood pressure; DBP, diastolic blood  
 80 pressure; FBG, fasting blood glucose; ULM, upper limit of normal.

81 All P values > 0.05 by Fisher's exact test

82

83

84

85

86

87

88

89

90

91

92

93

94

95

96

97

98

99

100

101

102

103

104

105

106 SUPPLEMENTARY FIGURE 1A Resistance exercise

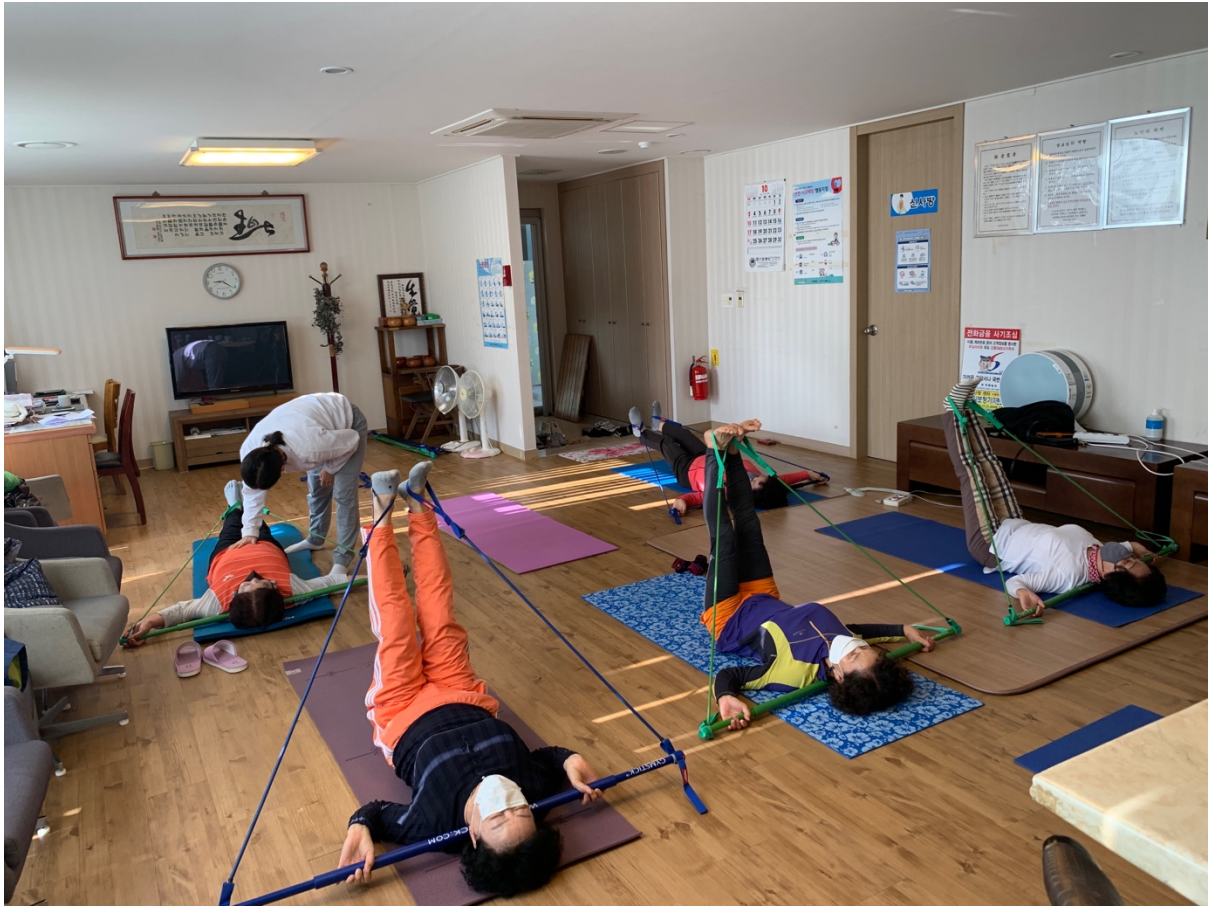

107

108

109

110

111

112

113

114

115

116

117

118

119

120

121



122

123

124 **SUPPLEMENTARY FIGURE 1B Resistance exercise**

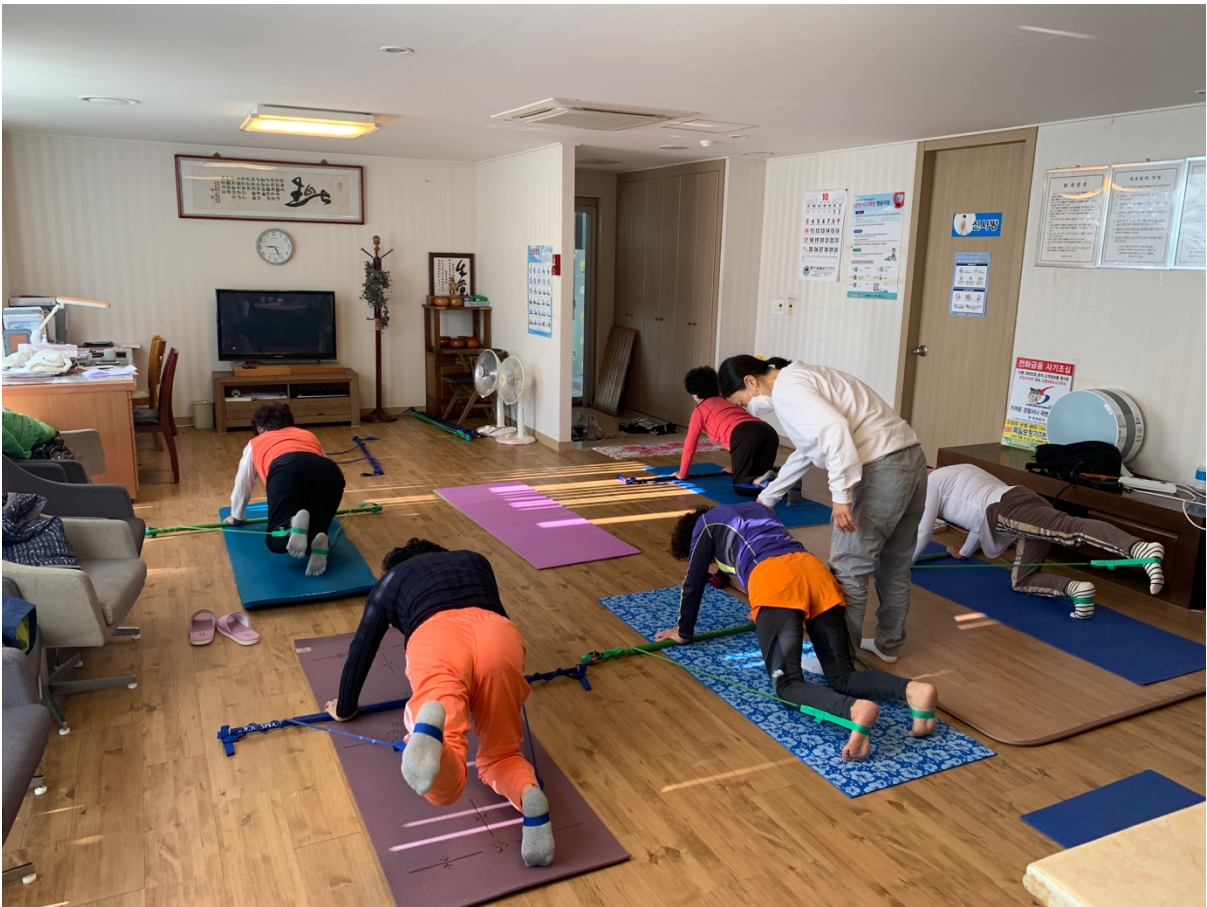

125

126

127

128

129

130

131

132

133

134

135

136

137

138

139

140

141

142 **SUPPLEMENTARY FIGURE 1C Resistance exercise**

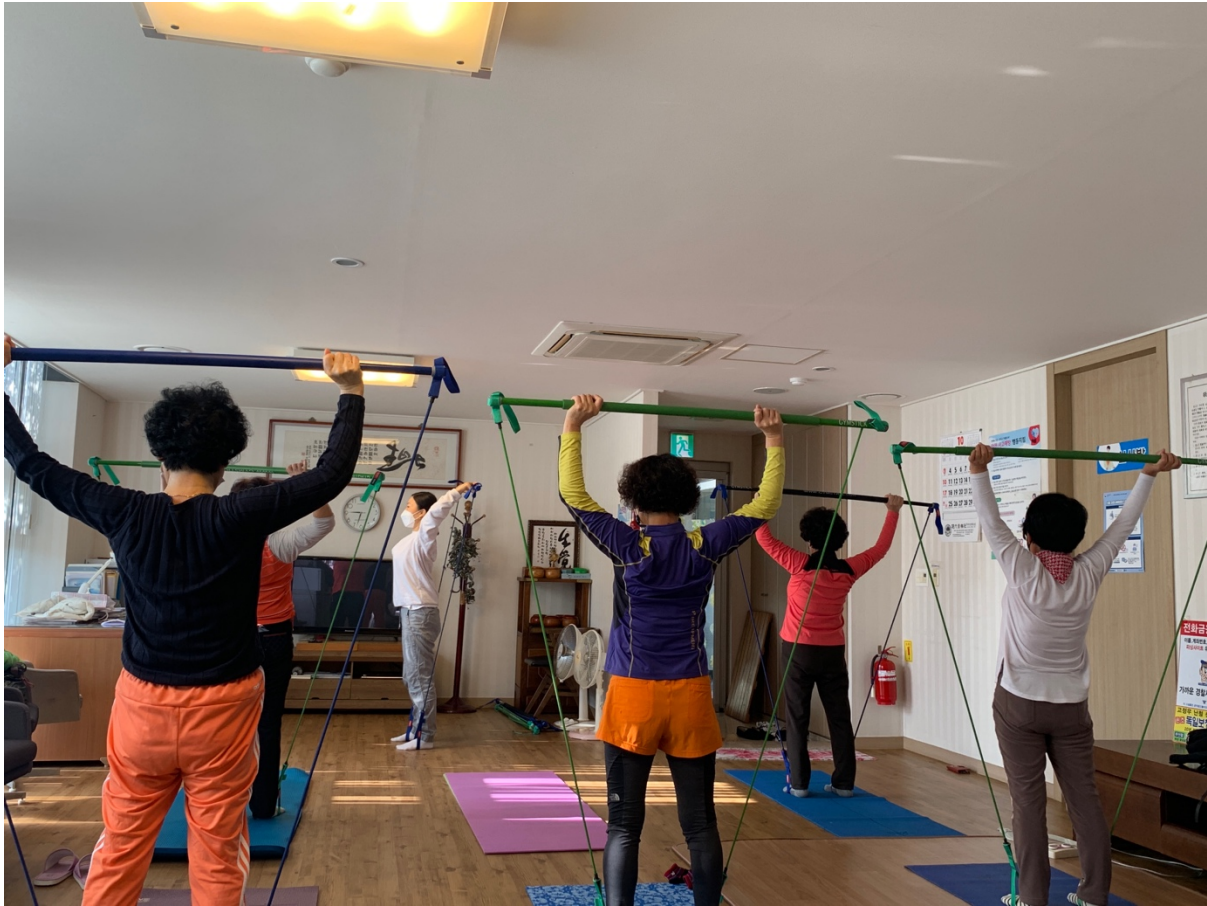

143

144

145
